# Supplementary material
Source: ML conference proceedings conference paper supplement (https://proceedings.mlr.press/v124/pan20a.html)
Supplement: Supplementary file [file pan20a-supp.pdf]

## Appendix

---

**Algorithm 1** Streaming Nonlinear Bayesian Tensor Decomposition (SNBTD)

---

- 1: Initialize  $q(\mathcal{U}, \mathcal{S}, \mathbf{w})$  or  $q(\mathcal{U}, \mathcal{S}, \mathbf{w}, \tau)$  with the prior.  
To avoid being stuck at zero mean, randomly perturb the mean of each  $s_{mj}$ ,  $u_{jt}^k$  and  $w_j$  with  $0.1\mathcal{N}(\cdot|0, 1)$
  - 2: **while** new entry batch  $\mathcal{B}_t$  arrives **do**
  - 3:   Use all the data points in  $\mathcal{B}_t$  to construct the blending distribution  $p_b(\mathcal{U}, \mathcal{S}, \mathbf{w})$  or  $p_b(\mathcal{U}, \mathcal{S}, \mathbf{w}, \tau)$ .
  - 4:   Update  $\{q(s_{mj})\}$ ,  $\{q(u_{jt}^k)\}$  and  $q(\mathbf{w})$  (and  $q(\tau)$  for continuous tensors) in parallel with conditional moment matching coupled with Gauss-Hermite quadrature and Taylor approximations.
  - 5: **end while**
  - 6: **return** The current posterior  $q(\cdot)$
-
